# Supplementary material for: A new cyclic supramolecular Zn(ii) complex derived from a N2O2oxime chelate ligand with luminescence mechanochromism
Source: Royal Society of Chemistry journal article supplement (doi:10.1039/c3dt52340c), 2013-12-03
Supplement: c3dt52340c.pdf [file c3dt52340c.pdf]

Supporting Information

**A new cyclic supermolecular Zn(II) complex derived from N<sub>2</sub>O<sub>2</sub>  
oxime chelate ligand with luminescence mechanochromism**

**Shou-Ting Zhang,<sup>a</sup> Tian-Rong Li,<sup>a</sup> Bao-Dui Wang,<sup>a</sup> Zheng-Yin Yang,<sup>\*a</sup> Jian  
Liu,<sup>a</sup> Zhi-Yi Wang,<sup>a</sup> and Wen-Kui Dong,<sup>b</sup>**

<sup>a</sup>State Key Laboratory of Applied Organic Chemistry and College of Chemistry and  
Chemical Engineering, Lanzhou University, Lanzhou 730000, PR China

<sup>b</sup>School of Chemical and Biological Engineering, Lanzhou Jiaotong University,  
Lanzhou, Gansu, P. R. China

**Experimental**

*Materials and physical measurements*

All chemicals were obtained from commercial suppliers and used without any further purification. Elemental analyses were carried out on an Elemental Vario EL analyzer. The IR spectra were obtained in KBr discs on a Thermo Mattson FTIR spectrometer in the 4000–400 cm<sup>-1</sup> region. Fluorescence spectra were generated on a Hitachi RF-5301 spectrophotometer equipped with quartz cuvettes of 1 cm path length. <sup>1</sup>H NMR and <sup>13</sup>C NMR spectra were measured on the Bruker 400 MHz instruments using TMS as an internal standard and CDCl<sub>3</sub> and C<sub>2</sub>D<sub>6</sub>OS as solvent at room temperature. X-ray single crystal structures were obtained on a Rapid Auto Version 3.0 Rigaku RAXIS-RAPID detector. The melting points of the compounds were determined on a Beijing XT4-100x microscopic melting point apparatus.

## ***Procedure for experiment***

### ***Preparation of H<sub>2</sub>L.***

To an ethanol solution (30 mL) of 1-phenyl-3-methyl-4-benzoyl-5-pyrazolone (PMBP) (1.70 g, 6.12 mmol) was added an ethanol solution (10 mL) of 1,2-bis(aminoxy)ethane (0.282 g, 3.06 mmol). The mixture solution was stirred at 65 °C for 8 h, after cooling to room temperature, the reaction mixture was filtered, washed successively with ethanol and ethanol / hexane (1:4), respectively. The precipitate was dried under vacuum, and obtained pale-yellow solid 1.65 g. Yield: 87.1%, m.p. 137-138 °C. <sup>1</sup>H NMR (400 MHz, CDCl<sub>3</sub>): 1.58 (s, 3H), 4.66 (t, J = 8 Hz, 2H), 7.32 (m, 4H), 7.42 (m, 4H), 7.65 (d, J = 8 Hz, 2H). <sup>13</sup>C NMR (400 MHz, C<sub>2</sub>D<sub>6</sub>OS): 14.6, 15.7, 21.3, 60.3, 65.5, 73.0, 129.4, 135.8, 150.0, 170.9. IR: 3442, 3058, 2932, 2879, 1617, 1593, 1557, 1499, 1456, 1405, 1361, 1308, 1220, 1053, 970, 846, 746, 694. Anal. Calcd. for C<sub>36</sub>H<sub>32</sub>N<sub>6</sub>O<sub>4</sub> (%): C 70.57, H 5.26, N 13.72. Found: C 70.50, H 5.37, N 13.61.

### ***Preparation of the Zn(II) complexes***

**Preparation of the crystal [ZnL(CH<sub>3</sub>OH)]:** a solution of Zn(II) acetate dihydrate (11.0 mg, 0.05 mmol) in methanol (4 mL) was added dropwise to a solution of H<sub>2</sub>L (30.1 mg, 0.05 mmol) in methanol (6 mL), which made the color of the mixing solution turned to colorless immediately, then the mixture was allowed to stand at room temperature for about one week. When the solvent was partially evaporated, several colorless block-shaped single crystals suitable for X-ray crystallographic analysis were obtained. <sup>1</sup>H NMR (400 MHz, C<sub>2</sub>D<sub>6</sub>OS): 1.57 (s, 3H), 3.13 (d, J = 5.2

Hz, 3H), 4.06 (t,  $J = 12.4$  Hz, 2H), 7.32 (m, 4H), 7.12 (m, 4H), 7.35 (d,  $J = 8$ Hz, 2H), 8.07 (d,  $J = 7.6$  Hz, 1H).  $^{13}\text{C}$  NMR (400 MHz,  $\text{C}_2\text{D}_6\text{OS}$ ): 15.6, 49.1, 70.6, 95.0, 119.5, 124.7, 127.5, 128.8, 129.1, 134.6, 140.0, 147.7, 162.2, 165.9. IR: 3592, 3435, 3056, 1955, 1597, 1569, 1506, 1480, 1434, 1367, 1356, 1272, 1089, 1068, 1045, 1018, 908, 869, 779, 760, 712, 693, 610, 568, 507, 453. Anal. Calcd. for  $[\text{ZnL}(\text{CH}_3\text{OH})]$  (%): C 62.76, H 4.84, N 11.87. Found: C 62.67, H 4.81, N 11.91.

**Preparation of the powder of the Zn(II) complex (unground sample):** the powder of the Zn(II) complex was synthesized according to an analogous method as the crystal sample. a solution of Zn(II) acetate dihydrate (104.4 mg, 0.47 mmol) in methanol (4 mL) was added dropwise to a solution of  $\text{H}_2\text{L}$  (261.2 mg, 0.43 mmol) in methanol (6 mL), which made the color of the mixing solution turned to colorless immediately, then the powder of the Zn(II) complex was obtained after two days. IR: 3436, 3058, 2924, 2834, 1958, 1600, 1568, 1501, 1456, 1434, 1373, 1354, 1241, 1088, 1070, 1049, 1015, 912, 870, 779, 759, 715, 696, 612, 571, 508, 454. Anal. Calcd. for the unground sample  $\text{ZnL}\cdot 2\text{CH}_3\text{OH}$  (%): C 61.67, H 5.18, N 11.35. Found: C 61.71, H 5.13, N 11.39.

**Preparation of the ground sample:** the powder Zn(II) complex was ground in agate mortar to obtain the ground sample. IR: 3594, 3436, 3058, 2926, 1958, 1598, 1569, 1506, 1479, 1434, 1370, 1351, 1273, 1089, 1070, 1045, 1015, 908, 870, 780, 760, 712, 693, 612, 568, 508, 452. Anal. Calcd. for the ground sample  $[\text{ZnLCH}_3\text{OH}]\cdot\text{CH}_3\text{OH}$  (%): C 61.67, H 5.18, N 11.35. Found: C 61.70, H 5.14, N 11.38.

### ***X-ray structure determination of [ZnL(CH<sub>3</sub>OH)]***

The single crystals of the complex [ZnL(CH<sub>3</sub>OH)] with approximate dimensions of 0.35 × 0.32 × 0.28 mm were placed on a Bruker Smart diffractometer equipped with Apex CCD area detector. The diffraction data were collected using a graphite monochromated Mo K $\alpha$  radiation ( $\lambda = 0.71073 \text{ \AA}$ ) at 293(2) K. The structures were solved by using the program SHELXS-97 and Fourier difference techniques, and refined by full-matrix least-squares method on  $F^2$  using SHELXL-97. All hydrogen atoms were added theoretically.

### ***Recovery experiment***

To a ground sample (0.3065g) of the Zn(II) complex was added methanol solution (1.5 mL), then the mixture was allowed to stand at room temperature for about 20 min.

**Captions:**

**Scheme 1** The synthetic route of H<sub>2</sub>L.

**Fig. S1** <sup>1</sup>H NMR of H<sub>2</sub>L.

**Fig. S2** <sup>13</sup>C NMR of H<sub>2</sub>L

**Fig. S3** IR spectra of H<sub>2</sub>L.

**Fig. S4** <sup>1</sup>H NMR of ZnL.

**Fig. S5** <sup>13</sup>C NMR of ZnL.

**Fig. S6.** TGA-DTG analyses of the unground sample.

**Fig. S7** TGA-DTG analyses of the ground sample.

**Fig. S8** TGA-DTG analyses of the crystal sample.

**Fig. S9** IR spectra of the unground sample (red), the ground sample (blue) and the crystal sample (black).

**Fig. S10** Powder X-ray diffraction patterns of the unground sample (red), the ground sample (blue) and the crystal Zn(II) sample (black).

**Fig. S11** Powder X-ray diffraction pattern of the recovered ground sample.

**Fig. S12** The Fluorescence emission of H<sub>2</sub>L (10mM) upon addition of Zn(II) (0.2 equivalent, 0.2 equivalent, 0.5 equivalent, 1.0 equivalent, 2.0 equivalent, 4.0 equivalent) in MeOH.

**Table S1** Crystal data and structure refinement for [ZnL(CH<sub>3</sub>OH)].

**Table S2** Selected bond distances [Å] and bond angles [°] for [ZnL(CH<sub>3</sub>OH)].

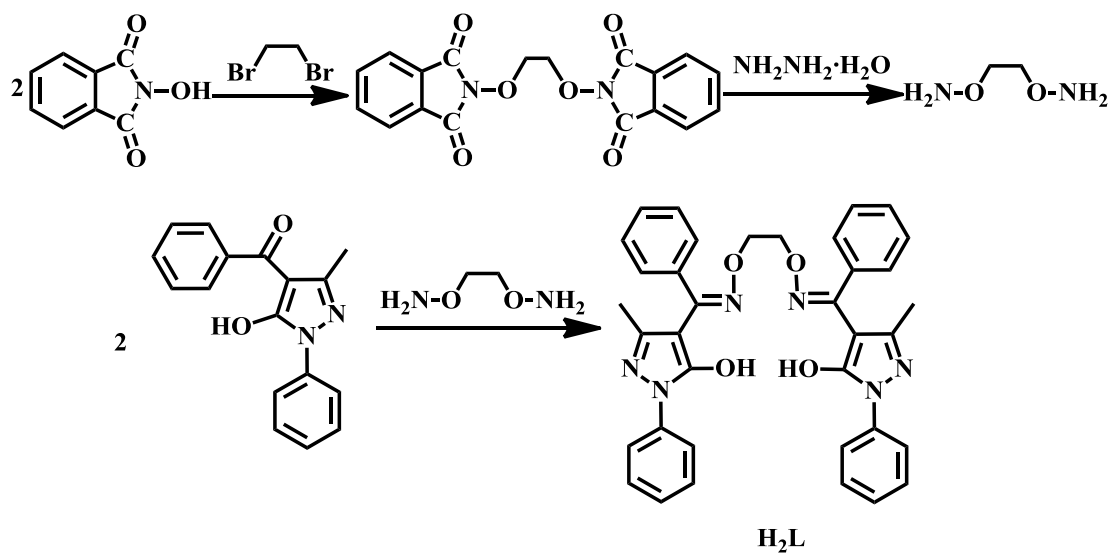

**Scheme 1** The synthetic route of  $\text{H}_2\text{L}$ .

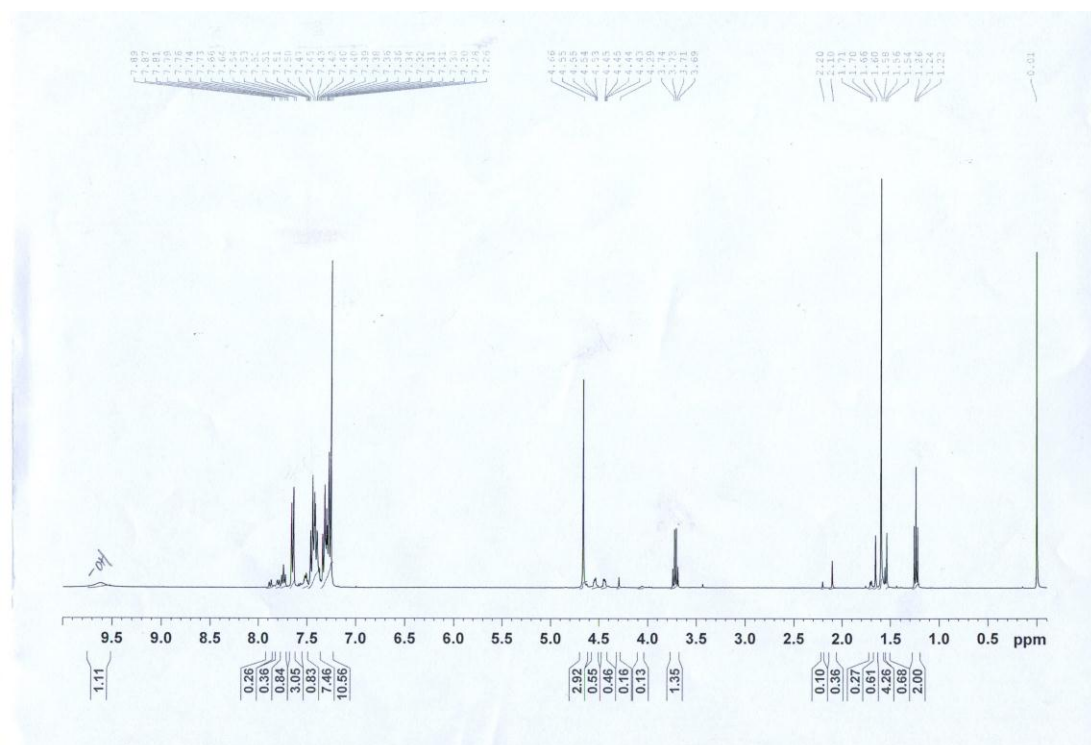

**Fig. S1**  $^1\text{H}$  NMR of  $\text{H}_2\text{L}$ .

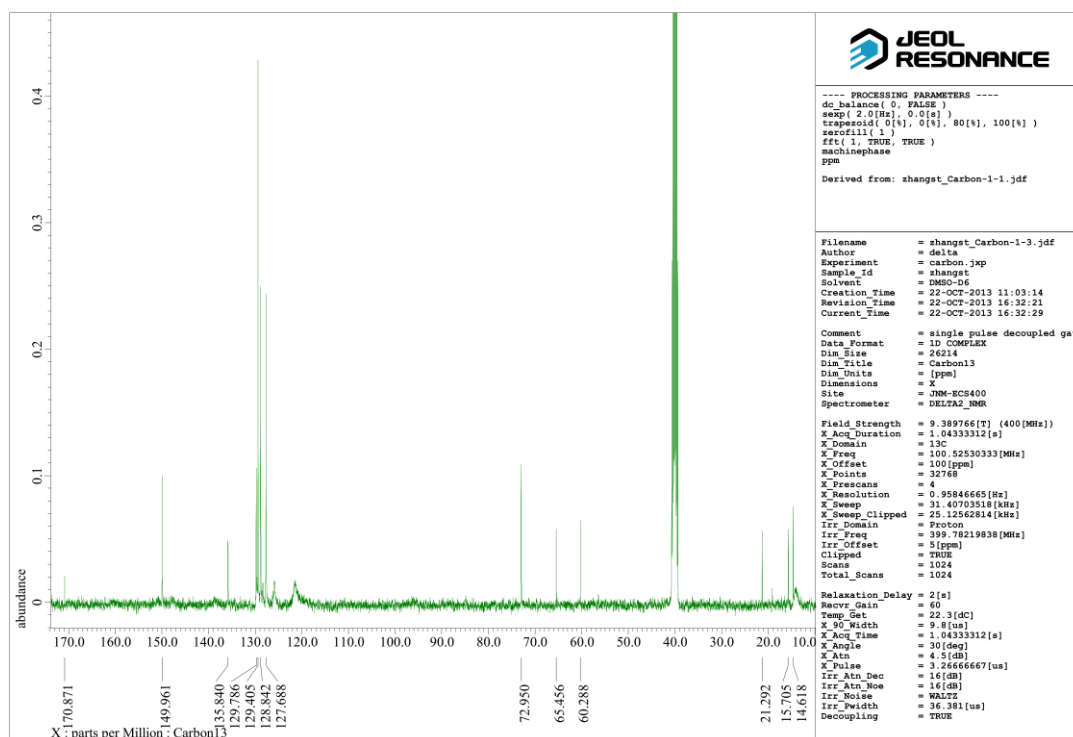

Fig. S2  $^{13}\text{C}$  NMR of  $\text{H}_2\text{L}$



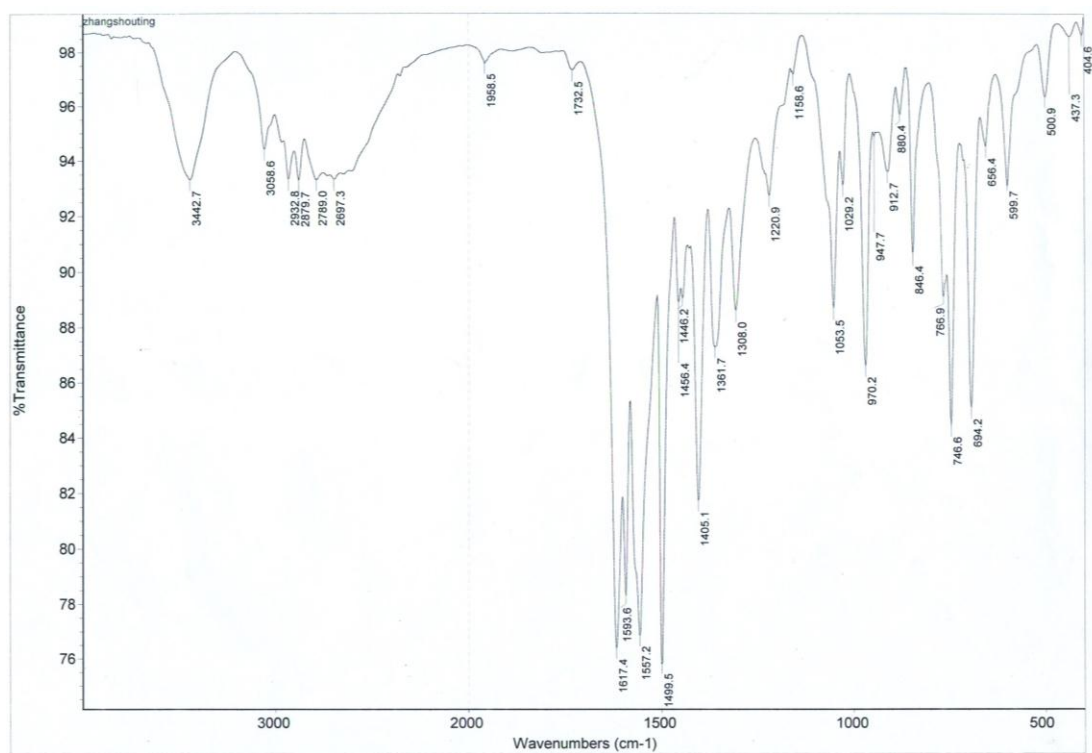

**Fig. S3.** IR spectra of H<sub>2</sub>L.

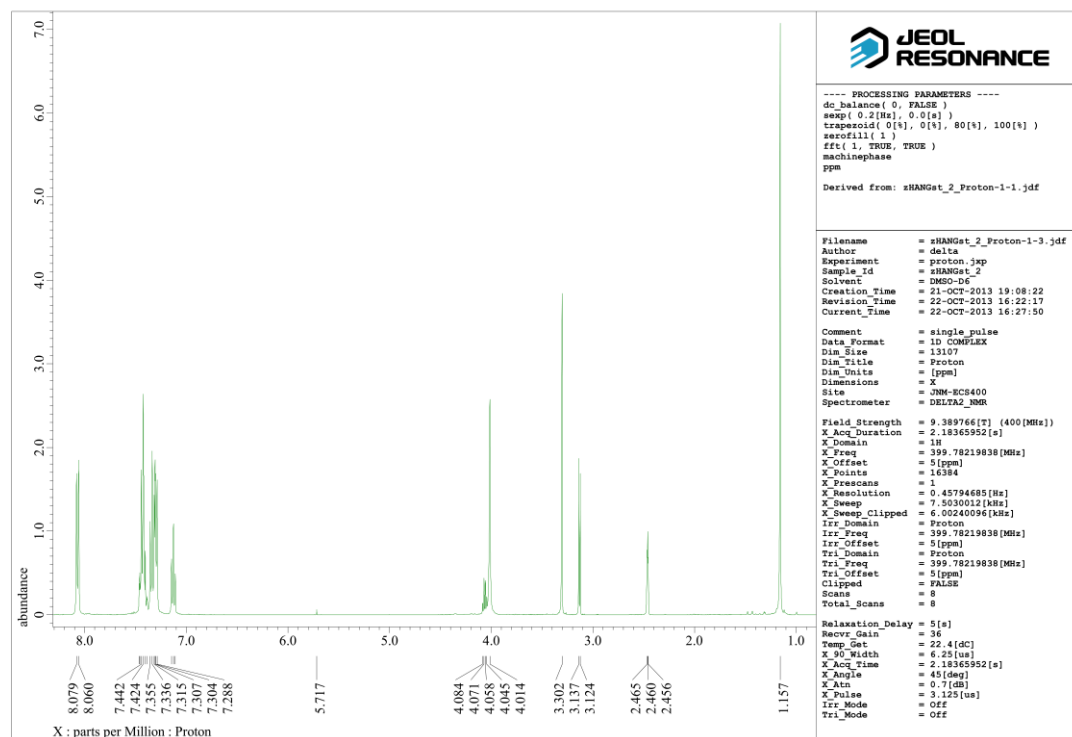

Fig. S4 <sup>1</sup>H NMR of ZnL.

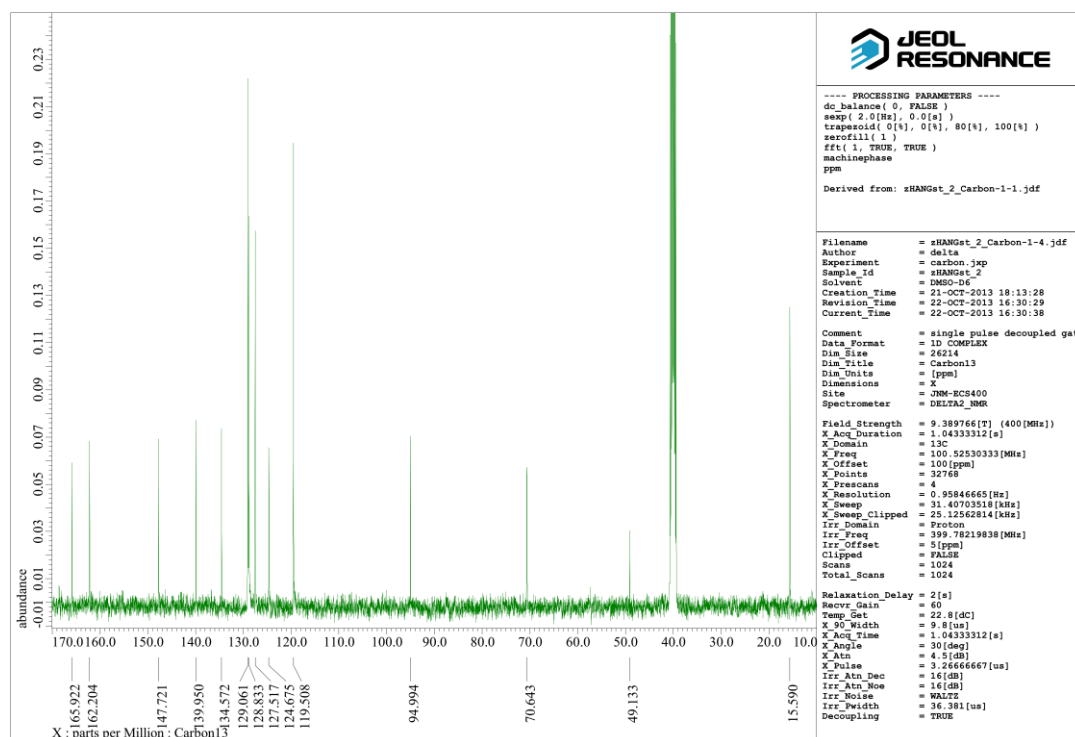

Fig. S5 <sup>13</sup>C NMR of ZnL.

仪器型号: WCT-2C 试样名称: ZnL 操作者姓名: ZST  
试样序号: powder 试样重量: 7.4 毫克mg  
气氛: 空 采样日期: 2013-9-27 13:37

## RSZ热分析系统报告

分析时间: 2003-1-1 1:39

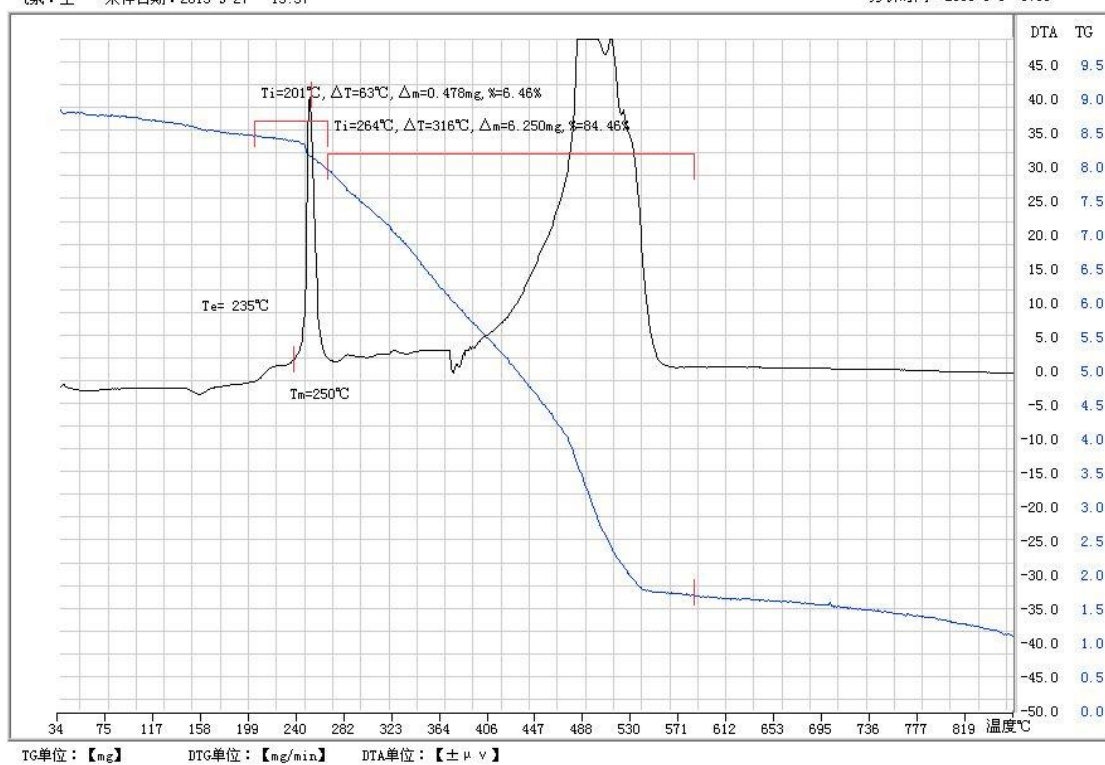

Fig. S6 TGA-DTG analyses of the unground sample.

仪器型号: WCT-2C 试样名称: Ground ZnL  
操作者姓名: ZST 试样序号: Ground  
试样重量: 6.5 毫克mg 气氛: 空

## RSZ热分析系统报告

分析时间: 2003-1-1 1:48

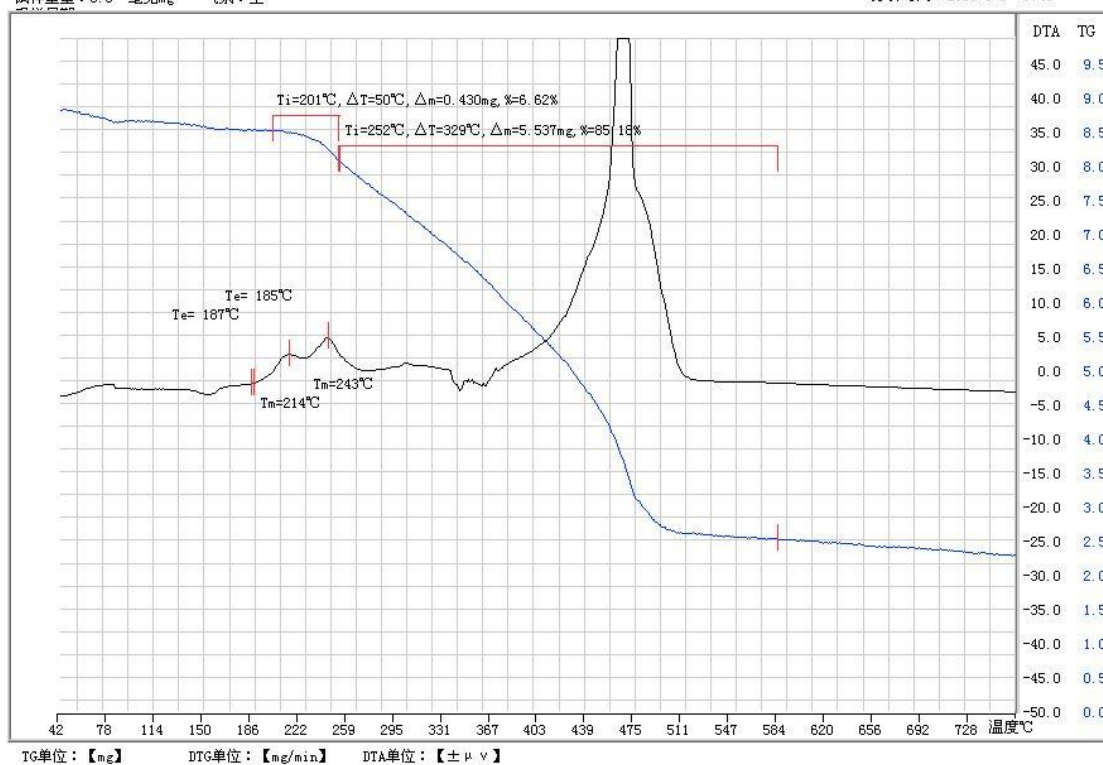

Fig. S7 TGA-DTG analyses of the ground sample.

仪器型号: WCT-2C 试样名称: Co 操作者姓名: h2f4  
试样序号: 1 试样重量: 8.0 毫克mg 气氛: 空  
采样日期: 2013-9-27 10:23

## RSZ热分析系统报告

分析时间: 2003-1-1 1:54

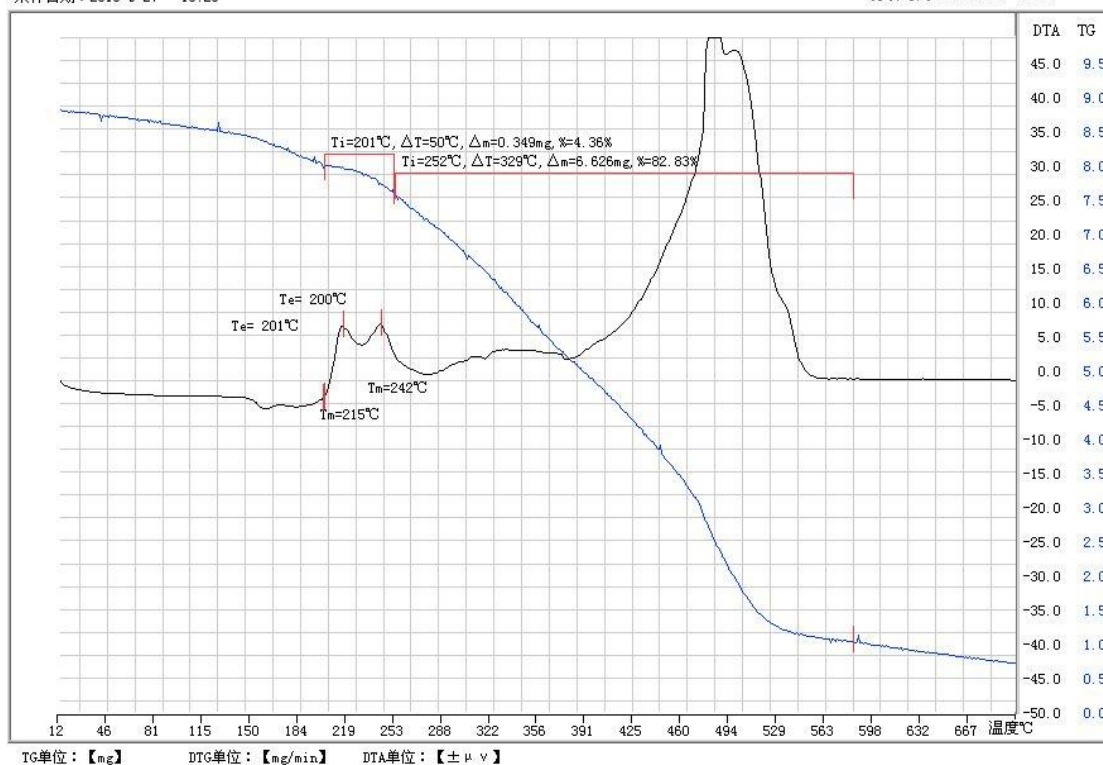

Fig. S8 TGA-DTG analyses of the crystal sample.

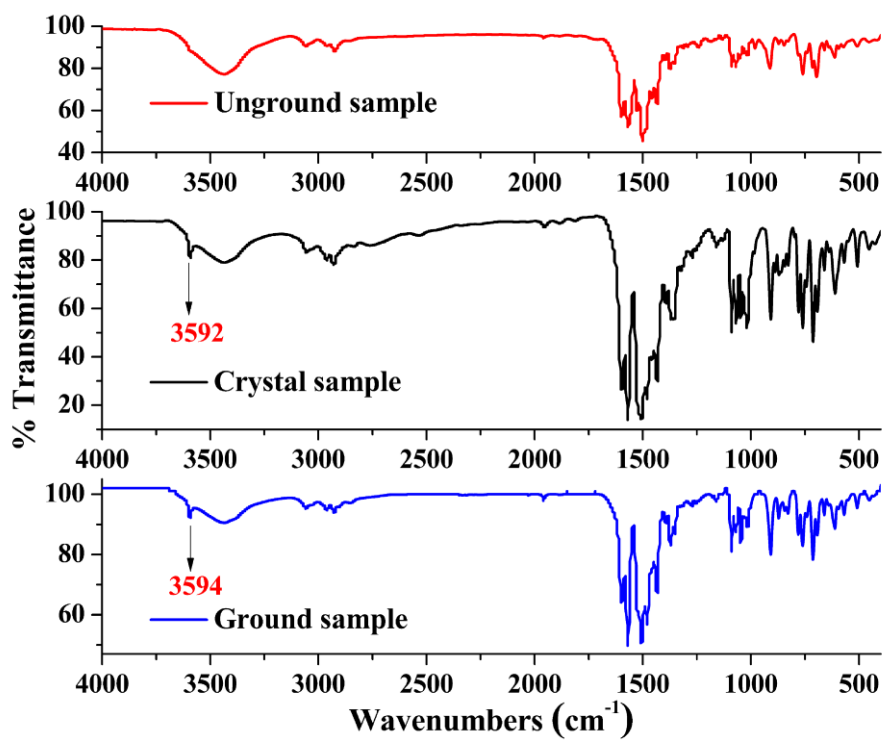

**Fig. S9** IR spectra of the unground sample (red), the ground sample (blue) and the crystal sample (black).

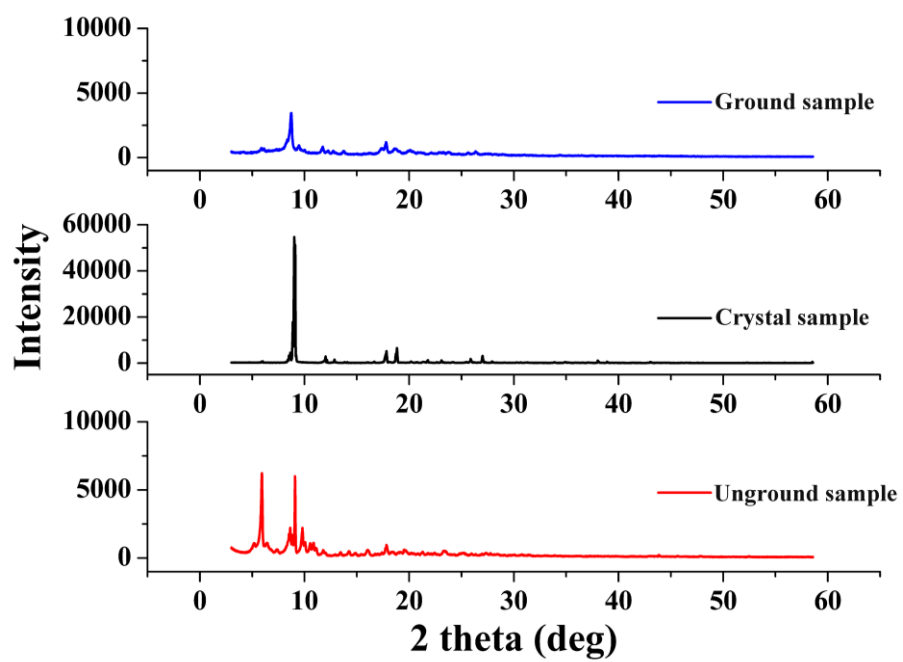

**Fig. S10** Powder X-ray diffraction patterns of the unground sample (red), the ground sample (blue) and the crystal Zn(II) sample (black).



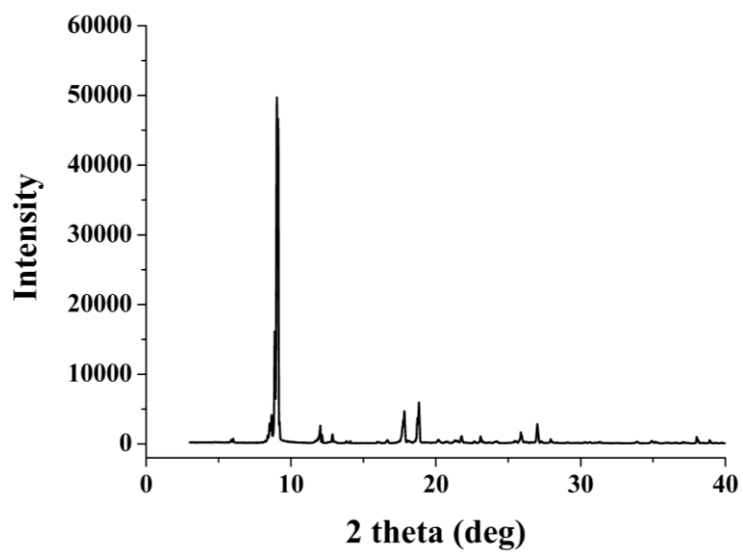

**Fig. S11.** Powder X-ray diffraction pattern of the recovered ground sample.

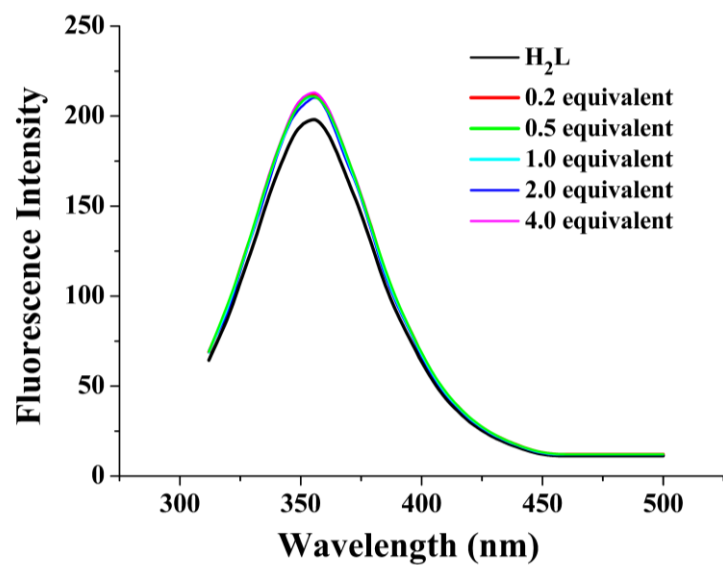

**Fig. S12** The Fluorescence emission of H<sub>2</sub>L (10mM) upon addition of Zn(II) (0.2 equivalent, 0.2 equivalent, 0.5 equivalent, 1.0 equivalent, 2.0 equivalent, 4.0 equivalent) in MeOH.

**Table S1** Crystal data and structure refinement for [ZnL(CH<sub>3</sub>OH)].

|                                           | Zn(II) complex                                                      |
|-------------------------------------------|---------------------------------------------------------------------|
| Empirical formula                         | C <sub>37</sub> H <sub>34</sub> N <sub>6</sub> O <sub>5</sub> Zn    |
| Formula weight                            | 708.07                                                              |
| Temperature (K)                           | 293(2)                                                              |
| Wavelength (Å)                            | 0.71073                                                             |
| Crystal system, Space group               | Triclinic, <i>P</i> -1                                              |
| Unit cell dimensions                      | 0.35 × 0.32 × 0.28                                                  |
| <i>a</i> (Å)                              | 10.6014(8)                                                          |
| <i>b</i> (Å)                              | 10.6656(8)                                                          |
| <i>c</i> (Å)                              | 15.898(2)                                                           |
| $\alpha$ (°)                              | 104.972(9)                                                          |
| $\beta$ (°)                               | 105.000(9)                                                          |
| $\gamma$ (°)                              | 91.803(6)                                                           |
| Volume (Å <sup>3</sup> )                  | 1668.0(3)                                                           |
| Z, Calculated density(Mg/m <sup>3</sup> ) | 2, 1.410                                                            |
| <i>F</i> (000)                            | 736                                                                 |
| Crystal size (mm)                         | 0.35 × 0.32 × 0.28                                                  |
| $\theta$ range for data collection (°)    | 2.9584 to 28.5666                                                   |
| Limiting indices                          | -13 ≤ <i>h</i> ≤ 13,<br>-13 ≤ <i>k</i> ≤ 13,<br>-19 ≤ <i>l</i> ≤ 19 |
| Reflections collected / unique            | 6683 / 458 [R(int) = 0.0399]                                        |
| Completeness to $\theta$                  | 97.86 % ( $\theta$ = 26.32°)                                        |
| Absorption correction                     | Semi-empirical from equivalents                                     |
| Refinement method                         | Full-matrix least-squares on <i>F</i> <sup>2</sup>                  |
| Final <i>R</i> indices [I > 2σ(I)]        | <i>R</i> <sub>1</sub> = 0.0399, <i>wR</i> <sub>2</sub> = 0.0768     |
| <i>R</i> indices (all data)               | <i>R</i> <sub>1</sub> = 0.0520, <i>wR</i> <sub>2</sub> = 0.0849     |

$$\omega = 1/[s^2(F_o^2)+(0.0202P)^2+0.5349P], \text{ where } P = (F_o^2+2F_c^2)/3$$

**Table S2** Selected bond distances [ $\text{\AA}$ ] and bond angles [ $^\circ$ ] for  $[\text{ZnL}(\text{CH}_3\text{OH})]$ .

| Bond            | Dist.     | Bond             | Dist.      | Bond              | Dist.     |
|-----------------|-----------|------------------|------------|-------------------|-----------|
| Zn(1)-O(1)      | 2.0204(2) | C(11)-N(3)       | 1.311(3)   | O(3)-N(4)         | 1.436(2)  |
| Zn(1)-O(4)      | 1.9406(2) | C(20)-N(4)       | 1.303(3)   | N(5)-N(6)         | 1.393(2)  |
| Zn(1)-O(5)      | 2.0682(2) | C(6)-N(1)        | 1.429(3)   | C(1)-C(2)         | 1.382(4)  |
| Zn(1)-N(3)      | 2.0583(2) | C(7)-N(1)        | 1.368(3)   | C(1)-C(6)         | 1.381(3)  |
| Zn(1)-N(4)      | 2.1986(2) | C(9)-N(2)        | 1.316(3)   | C(2)-C(3)         | 1.379(4)  |
| O(1)-C(7)       | 1.269(2)  | C(28)-N(5)       | 1.325(3)   | C(3)-C(4)         | 1.372(4)  |
| O(4)-C(30)      | 1.282(2)  | C(30)-N(6)       | 1.371(3)   | C(18)-C(19)       | 1.506(4)  |
| C(7)-C(8)       | 1.420(3)  | C(31)-N(6)       | 1.422(3)   | O(3)-C(19)        | 1.425(3)  |
| C(27)-C(30)     | 1.410(3)  | O(2)-N(3)        | 1.436(2)   | N(1)-N(2)         | 1.399(2)  |
| Bond            | Angles    | Bond             | Angles     | Bond              | Angles    |
| O(1)-Zn(1)-O(5) | 86.61(7)  | O(4)-Zn(1)-N(4)  | 88.15(7)   | C(37A)-O(5)-Zn(1) | 128.6(3)  |
| O(1)-Zn(1)-N(3) | 89.96(7)  | O(5)-Zn(1)-N(4)  | 86.20(7)   | C(37B)-O(5)-Zn(1) | 125.5(9)  |
| O(1)-Zn(1)-N(4) | 172.48(7) | N(3)-Zn(1)-O(5)  | 138.34(8)  | O(2)-N(3)-Zn(1)   | 114.61(1) |
| O(4)-Zn(1)-O(1) | 96.26(7)  | N(3)-Zn(1)-N(4)  | 93.95(7)   | C(11)-N(3)-Zn(1)  | 129.84(2) |
| O(4)-Zn(1)-O(5) | 108.91(7) | C(7)-O(1)-Zn(1)  | 122.49(14) | O(3)-N(4)-Zn(1)   | 123.47(1) |
| O(4)-Zn(1)-N(3) | 112.73(8) | C(30)-O(4)-Zn(1) | 122.35(14) | C(20)-N(4)-Zn(1)  | 125.72(2) |

Symmetry transformations used to generate equivalent atoms: -x,-y,-z
